# Supplementary material
Source: MDPI journal article supplement (https://www.mdpi.com/2673-7655/2/3/17)
Supplement: s1 [file s1]

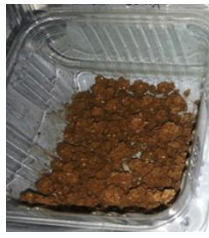

(a)

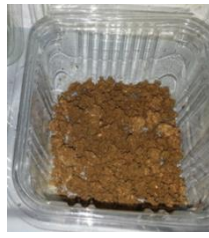

(b)

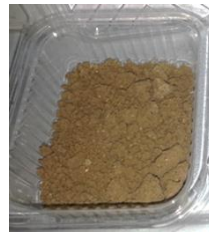

(c)

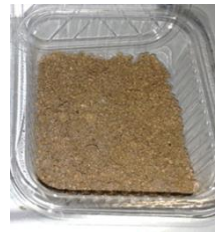

(d)

**Figure S1.** Detail of the soil structure in the control (a) and treated samples with at three different doses of seed meal: b)D, c) 10D and d) 100D.
